# Supplementary material
Source: PubMed Central journal article supplement (PMC7854504)
Supplement: NIHMS1653476-supplement-3.pdf [file NIHMS1653476-supplement-3.pdf]

Supplemental Figure 1

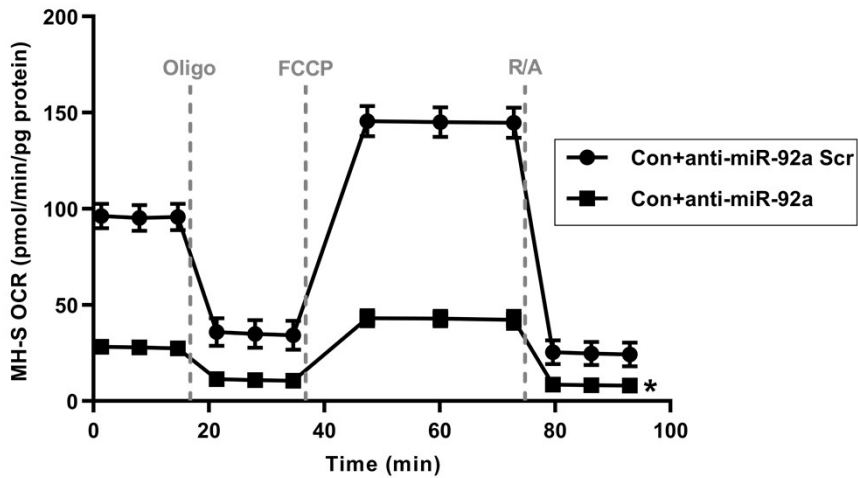

**AM mitochondrial bioenergetics is mediated by miR-92a in MH-S cells.**

MH-S transiently transfected with anti-miR-92a scrambled (anti-miR-92a-Scr) or antisense-miR-92a (anti-miR-92a) for one day (n=9). Mitochondrial bioenergetic profiles were generated in response to oligomycin (Oligo; mitochondrial complex V inhibitor), carbonilcyanide p-triflouromethoxyphenylhydrazone (FCCP; ATP synthase inhibitor and proton uncoupler), and rotenone (mitochondrial complex I inhibitor) plus antimycin A (mitochondrial complex III inhibitor) (R/A) using an extracellular flux analyzer. Oxygen consumption rate (OCR) from mitochondrial bioenergetic profiling, normalized to protein levels, are expressed as mean  $\pm$  SEM, relative to control.
