# Supplementary material
Source: PubMed Central journal article supplement (PMC7854504)
Supplement: NIHMS1653476-supplement-4.pdf [file NIHMS1653476-supplement-4.pdf]

Supplemental Figure 2

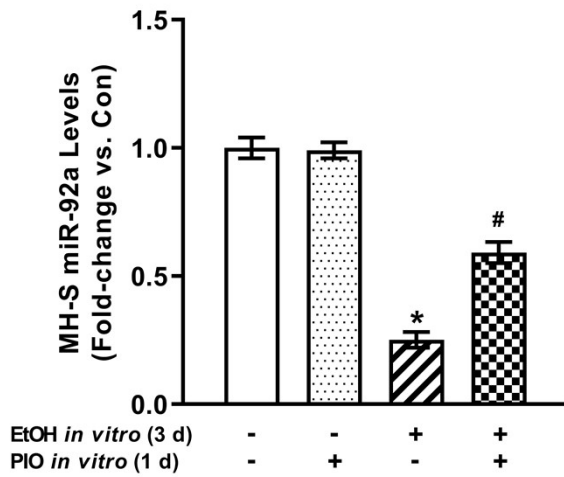

**Pioglitazone treatment in vitro reverses ethanol-mediated decreased miR-92a expression.**

MH-S cells were exposed to either control (Con) or ethanol (EtOH; 0.08%, 3 d) ± pioglitazone (PIO, last day of ethanol) (n=6). miR-92a levels were measured by qRT-PCR, in duplicate, normalized to U5, and are expressed as mean ± SEM, relative to control.
